# Supplementary material
Source: HighWire-hosted journal article supplement (https://jnm.snmjournals.org/highwire/filestream/94943/field_highwire_adjunct_files/0/168799_Supplemental_Data.pdf)
Supplement: 168799_Supplemental_Data.pdf [file 168799_Supplemental_Data.pdf]

**TABLE S1.** Primary data of all patients and all analyzed lesions

| Patient number | Gender: Male (M) / Female (F) | Variant: Papillary (P) / Follicular (F) | TNM Stage | Lesion number | Lesion type: Remnant (R)/ Metastasis (M) | Lesion volume (mL) | Lesion absorbed dose per I-131 activity (Gy/GBq) | Lesion absorbed dose (Gy) | Complete lesion response (Y/N) |
|----------------|-------------------------------|-----------------------------------------|-----------|---------------|------------------------------------------|--------------------|--------------------------------------------------|---------------------------|--------------------------------|
| 1              | M                             | P                                       | 1         | 1             | R                                        | 0.47               | 187                                              | 519                       | Y                              |
|                |                               |                                         |           | 2             | R                                        | 0.37               | 23.2                                             | 64.4                      | N                              |
| 2              | F                             | P                                       | 4         | 1             | R                                        | 0.15               | 72.3                                             | 201                       | Y                              |
|                |                               |                                         |           | 2             | R                                        | 0.15               | 2.3                                              | 6.5                       | N                              |
|                |                               |                                         |           | 3             | R                                        | 0.15               | 19.1                                             | 53.1                      | Y                              |
|                |                               |                                         |           | 4             | M                                        | 0.15               | 1.0                                              | 2.8                       | Y                              |
|                |                               |                                         |           | 5             | M                                        | 0.15               | 0.7                                              | 2.0                       | Y                              |
| 3              | M                             | P                                       | 3         | 1             | R                                        | 0.39               | 20.7                                             | 57.3                      | N                              |
|                |                               |                                         |           | 2             | R                                        | 0.43               | 5.9                                              | 16.3                      | N                              |
| 4              | F                             | F                                       | 4         | 1             | M                                        | 0.73               | 6.7                                              | 37.2                      | N                              |
|                |                               |                                         |           | 2             | M                                        | 2.91               | 2.1                                              | 11.8                      | N                              |
|                |                               |                                         |           | 3             | M                                        | 0.66               | 2.0                                              | 10.9                      | N                              |
|                |                               |                                         |           | 4             | R                                        | 4.34               | 5.7                                              | 31.7                      | Y                              |
|                |                               |                                         |           | 5             | M                                        | 9.81               | 1.2                                              | 6.4                       | N                              |
|                |                               |                                         |           | 6             | M                                        | 0.50               | 1.8                                              | 9.9                       | N                              |
|                |                               |                                         |           | 7             | M                                        | 19.4               | 1.3                                              | 7.3                       | N                              |
|                |                               |                                         |           | 8             | M                                        | 1.73               | 1.6                                              | 8.7                       | N                              |
|                |                               |                                         |           | 9             | M                                        | 12.9               | 0.9                                              | 5.0                       | N                              |
|                |                               |                                         |           | 10            | M                                        | 1.83               | 6.9                                              | 38.4                      | N                              |
| 5              | F                             | P                                       | 1         | 1             | R                                        | 0.96               | 370                                              | 1.03·10 <sup>3</sup>      | Y                              |
|                |                               |                                         |           | 2             | R                                        | 0.15               | 10.7                                             | 29.6                      | Y                              |
|                |                               |                                         |           | 3             | M                                        | 0.15               | 13.4                                             | 37.2                      | Y                              |
|                |                               |                                         |           | 4             | M                                        | 0.15               | 6.2                                              | 17.3                      | N                              |
|                |                               |                                         |           | 5             | M                                        | 0.24               | 1.6                                              | 4.5                       | N                              |
|                |                               |                                         |           | 6             | M                                        | 0.15               | 2.0                                              | 5.6                       | Y                              |
| 6              | M                             | F                                       | 1         | 1             | R                                        | 5.65               | 111                                              | 309                       | N                              |

|    |   |   |   |   |   |      |      |                      |   |
|----|---|---|---|---|---|------|------|----------------------|---|
|    |   |   |   | 2 | R | 2.22 | 150  | 416                  | Y |
|    |   |   |   | 3 | R | 0.15 | 22.0 | 61.1                 | Y |
|    |   |   |   | 4 | R | 0.15 | 19.4 | 53.9                 | N |
|    |   |   |   | 5 | R | 0.26 | 18.7 | 51.9                 | N |
| 7  | F | F | 1 | 1 | R | 0.36 | 15.4 | 42.7                 | N |
|    |   |   |   | 2 | R | 0.15 | 2.1  | 5.8                  | Y |
|    |   |   |   | 3 | R | 0.15 | 1.8  | 5.0                  | Y |
| 8  | F | F | 4 | 1 | R | 1.11 | 311  | 1.72·10 <sup>3</sup> | Y |
|    |   |   |   | 2 | R | 0.84 | 268  | 1.49·10 <sup>3</sup> | N |
|    |   |   |   | 3 | M | 0.60 | 147  | 813                  | Y |
|    |   |   |   | 4 | M | 2.16 | 20.4 | 113                  | N |
|    |   |   |   | 5 | M | 0.15 | 34.6 | 192                  | N |
| 9  | M | P | 1 | 1 | R | 1.44 | 258  | 286                  | Y |
|    |   |   |   | 2 | R | 0.15 | 197  | 219                  | N |
|    |   |   |   | 3 | R | 0.23 | 37.7 | 41.9                 | N |
|    |   |   |   | 4 | R | 0.15 | 57.3 | 63.6                 | N |
|    |   |   |   | 5 | R | 0.15 | 22.1 | 24.6                 | N |
| 10 | F | P | 3 | 1 | M | 0.15 | 2.2  | 6.2                  | Y |
|    |   |   |   | 2 | R | 0.26 | 189  | 523                  | Y |
|    |   |   |   | 3 | R | 0.34 | 276  | 766                  | Y |
|    |   |   |   | 4 | R | 0.15 | 108  | 301                  | Y |
| 11 | M | P | 4 | 1 | R | 0.28 | 228  | 634                  | Y |
|    |   |   |   | 2 | R | 0.15 | 5.8  | 16.1                 | Y |
|    |   |   |   | 3 | R | 0.15 | 47.9 | 133                  | Y |
| 12 | F | F | 1 | 1 | R | 0.15 | 89.2 | 247                  | Y |
|    |   |   |   | 2 | R | 0.15 | 160  | 443                  | Y |
| 13 | F | P | 1 | 1 | M | 1.01 | 487  | 1.35·10 <sup>3</sup> | Y |
|    |   |   |   | 2 | M | 0.15 | 234  | 650                  | Y |
|    |   |   |   | 3 | M | 0.15 | 181  | 502                  | Y |
|    |   |   |   | 4 | M | 0.15 | 84.3 | 234                  | Y |
|    |   |   |   | 5 | M | 0.65 | 190  | 528                  | Y |

|    |   |   |   |   |   |      |                   |                   |   |
|----|---|---|---|---|---|------|-------------------|-------------------|---|
|    |   |   |   | 6 | M | 0.35 | 225               | 624               | Y |
|    |   |   |   | 7 | R | 0.92 | 483               | $1.34 \cdot 10^3$ | Y |
| 14 | F | F | 4 | 1 | M | 0.15 | $1.50 \cdot 10^3$ | $4.62 \cdot 10^3$ | Y |
|    |   |   |   | 2 | M | 0.15 | 629               | $1.75 \cdot 10^3$ | Y |
|    |   |   |   | 3 | R | 0.15 | 665               | $1.85 \cdot 10^3$ | Y |
|    |   |   |   | 4 | R | 0.19 | $3.99 \cdot 10^3$ | $1.11 \cdot 10^4$ | Y |
| 15 | M | P | 1 | 1 | M | 0.15 | 24.0              | 66.5              | Y |
|    |   |   |   | 2 | R | 0.55 | $1.46 \cdot 10^3$ | $4.05 \cdot 10^3$ | Y |
|    |   |   |   | 3 | R | 0.15 | $2.31 \cdot 10^3$ | $6.41 \cdot 10^3$ | Y |
|    |   |   |   | 4 | R | 0.15 | 23.1              | 64.2              | Y |
|    |   |   |   | 5 | R | 0.15 | 238               | 659               | Y |
| 16 | F | F | 4 | 1 | M | 0.52 | 6.8               | 25.2              | N |
| 17 | F | F | 2 | 1 | R | 0.15 | 1.6               | 8.8               | Y |
| 18 | F | P | 1 | 1 | R | 0.15 | 124               | 344               | Y |
|    |   |   |   | 2 | R | 0.38 | 105               | 292               | Y |
|    |   |   |   | 3 | R | 0.15 | 72.1              | 200               | Y |
|    |   |   |   | 4 | R | 0.46 | 406               | $1.13 \cdot 10^3$ | Y |
|    |   |   |   | 5 | R | 0.15 | 300               | 832               | Y |
| 19 | F | P | 1 | 1 | R | 0.26 | 848               | $2.35 \cdot 10^3$ | Y |
|    |   |   |   | 2 | R | 0.15 | 58.2              | 162               | Y |
|    |   |   |   | 3 | R | 0.15 | 98.4              | 273               | Y |
|    |   |   |   | 4 | R | 0.15 | 8.2               | 22.7              | Y |
| 20 | F | F | 1 | 1 | R | 0.15 | 36.6              | 101               | Y |
|    |   |   |   | 2 | R | 0.15 | 2.7               | 7.4               | Y |
| 21 | F | F | 3 | 1 | R | 0.15 | 178               | 493               | Y |
|    |   |   |   | 2 | R | 0.15 | 91.3              | 253               | Y |
|    |   |   |   | 3 | R | 0.15 | 8.7               | 24.2              | Y |
|    |   |   |   | 4 | R | 0.15 | 3.8               | 10.6              | Y |
| 22 | F | P | 3 | 1 | M | 0.15 | 64.0              | 177               | Y |
|    |   |   |   | 2 | M | 0.15 | 17.6              | 48.7              | Y |
|    |   |   |   | 3 | M | 0.15 | 23.0              | 63.9              | Y |

|    |   |   |   |    |   |      |      |      |   |
|----|---|---|---|----|---|------|------|------|---|
|    |   |   |   | 4  | M | 0.15 | 23.1 | 64.0 | Y |
|    |   |   |   | 5  | M | 0.15 | 3.1  | 8.7  | Y |
|    |   |   |   | 6  | M | 0.15 | 6.3  | 17.6 | Y |
|    |   |   |   | 7  | R | 0.15 | 21.2 | 58.8 | Y |
|    |   |   |   | 8  | M | 0.15 | 15.1 | 42.0 | Y |
|    |   |   |   | 9  | R | 0.15 | 26.5 | 79.5 | Y |
|    |   |   |   | 10 | R | 0.24 | 5.9  | 16.4 | Y |
|    |   |   |   | 11 | R | 0.15 | 11.9 | 33.1 | Y |
|    |   |   |   | 12 | R | 0.15 | 2.0  | 5.4  | Y |
|    |   |   |   | 13 | R | 0.34 | 5.5  | 15.4 | Y |
| 23 | F | P | 1 | 1  | R | 0.15 | 2.6  | 7.2  | Y |
|    |   |   |   | 2  | R | 0.15 | 27.4 | 76.1 | Y |
|    |   |   |   | 3  | R | 0.15 | 5.7  | 15.8 | Y |
| 24 | F | P | 3 | 1  | R | 0.15 | 32.8 | 91.1 | Y |
|    |   |   |   | 2  | R | 0.15 | 66.5 | 185  | N |
| 25 | M | P | 3 | 1  | M | 0.15 | 95.8 | 266  | Y |
|    |   |   |   | 2  | M | 0.15 | 4.7  | 13.1 | Y |
|    |   |   |   | 3  | M | 0.15 | 1.7  | 4.6  | Y |
|    |   |   |   | 4  | M | 0.15 | 5.2  | 14.4 | Y |
|    |   |   |   | 5  | R | 0.15 | 117  | 325  | Y |
|    |   |   |   | 6  | R | 0.15 | 48.4 | 134  | Y |
|    |   |   |   | 7  | R | 0.15 | 14.6 | 40.4 | Y |
|    |   |   |   | 8  | R | 0.15 | 49.7 | 138  | Y |
| 26 | F | P | 3 | 1  | R | 0.32 | 69.9 | 194  | Y |
|    |   |   |   | 2  | R | 0.15 | 2.3  | 6.3  | Y |
| 27 | F | P | 2 | 1  | R | 0.24 | 48.1 | 133  | Y |
|    |   |   |   | 2  | R | 0.19 | 110  | 305  | Y |
| 28 | F | P | 1 | 1  | R | 0.15 | 143  | 396  | Y |
|    |   |   |   | 2  | R | 0.15 | 52.3 | 145  | Y |
|    |   |   |   | 3  | R | 0.15 | 1.8  | 5.0  | Y |
| 29 | M | P | 3 | 1  | R | 0.15 | 29.2 | 81.0 | Y |

|    |   |   |   |   |   |      |                   |                   |   |
|----|---|---|---|---|---|------|-------------------|-------------------|---|
|    |   |   |   | 2 | R | 0.15 | 19.7              | 54.8              | Y |
|    |   |   |   | 3 | M | 0.28 | 20.6              | 57.1              | Y |
|    |   |   |   | 4 | R | 0.29 | 60.8              | 169               | Y |
|    |   |   |   | 5 | R | 0.15 | 90.8              | 252               | Y |
| 30 | F | P | 1 | 1 | R | 0.25 | 277               | 769               | Y |
|    |   |   |   | 2 | R | 0.15 | 240               | 666               | Y |
|    |   |   |   | 3 | R | 0.15 | 3.6               | 10.1              | Y |
| 31 | F | F | 1 | 1 | M | 0.15 | 13.9              | 38.5              | Y |
|    |   |   |   | 2 | R | 1.52 | 12.9              | 35.7              | Y |
|    |   |   |   | 3 | R | 0.15 | 10.2              | 28.2              | Y |
| 32 | F | F | 3 | 1 | R | 0.28 | 250               | 694               | Y |
|    |   |   |   | 2 | R | 0.15 | 104               | 289               | Y |
|    |   |   |   | 3 | R | 0.15 | 42.0              | 116               | Y |
| 33 | F | F | 3 | 1 | R | 1.40 | 279               | 775               | Y |
| 34 | M | P | 3 | 1 | R | 0.15 | 143               | 396               | Y |
|    |   |   |   | 2 | R | 0.93 | 141               | 391               | Y |
|    |   |   |   | 3 | M | 0.15 | 12.2              | 33.8              | Y |
|    |   |   |   | 4 | R | 0.15 | 7.3               | 20.3              | Y |
| 35 | F | P | 3 | 1 | M | 1.77 | 15.1              | 42.0              | Y |
|    |   |   |   | 2 | M | 0.15 | 38.5              | 107               | Y |
|    |   |   |   | 3 | R | 0.30 | 0.8               | 2.3               | Y |
|    |   |   |   | 4 | R | 0.15 | 51.6              | 59.9              | Y |
| 36 | F | P | 3 | 1 | R | 0.15 | 12.2              | 34.0              | Y |
| 37 | F | F | 3 | 1 | R | 1.18 | 580               | $1.61 \cdot 10^3$ | Y |
|    |   |   |   | 2 | R | 0.23 | 462               | $1.28 \cdot 10^3$ | Y |
|    |   |   |   | 3 | R | 0.20 | 41.3              | 115               | Y |
| 38 | F | P | 2 | 1 | R | 0.15 | $1.13 \cdot 10^3$ | $3.15 \cdot 10^3$ | Y |
|    |   |   |   | 2 | R | 0.15 | 35.5              | 98.5              | Y |
|    |   |   |   | 3 | R | 0.15 | 56.4              | 156               | Y |
| 39 | F | F | 1 | 1 | R | 0.15 | $4.07 \cdot 10^3$ | $1.13 \cdot 10^4$ | Y |
|    |   |   |   | 2 | R | 0.15 | 339               | 941               | Y |
| 40 | F | P | 1 | 1 | R | 0.61 | $1.37 \cdot 10^3$ | $3.81 \cdot 10^3$ | Y |

|    |   |   |   |   |   |      |                   |                   |   |
|----|---|---|---|---|---|------|-------------------|-------------------|---|
|    |   |   |   | 2 | R | 0.48 | 363               | $1.01 \cdot 10^3$ | Y |
| 41 | M | P | 3 | 1 | R | 0.53 | 804               | $2.23 \cdot 10^3$ | Y |
|    |   |   |   | 2 | R | 0.15 | 17.4              | 48.2              | Y |
| 42 | M | P | 1 | 1 | R | 0.58 | 12.7              | 35.2              | Y |
|    | F | P | 1 | 1 | R | 1.10 | $1.15 \cdot 10^3$ | $3.20 \cdot 10^3$ | Y |
|    |   |   |   | 2 | R | 0.15 | 177               | 491               | Y |
|    |   |   |   | 3 | R | 0.15 | 325               | 903               | Y |
|    |   |   |   | 4 | R | 0.15 | 192               | 533               | Y |
| 44 | F | F | 2 | 1 | R | 0.97 | 478               | $1.33 \cdot 10^3$ | Y |
|    |   |   |   | 2 | R | 0.48 | $1.29 \cdot 10^3$ | $3.58 \cdot 10^3$ | Y |
| 45 | F | P | 1 | 1 | R | 0.34 | 732               | $2.03 \cdot 10^3$ | Y |
|    |   |   |   | 2 | R | 0.56 | 281               | 781               | Y |
| 46 | F | F | 1 | 1 | R | 0.15 | 496               | $1.38 \cdot 10^3$ | Y |
|    |   |   |   | 2 | R | 0.15 | $2.31 \cdot 10^3$ | $6.41 \cdot 10^3$ | Y |
|    |   |   |   | 3 | R | 0.15 | 526               | $1.46 \cdot 10^3$ | Y |
|    |   |   |   | 4 | R | 0.15 | 650               | $1.80 \cdot 10^3$ | Y |
| 47 | F | P | 3 | 1 | R | 0.15 | 23.4              | 130               | Y |
